# Supplementary material for: Anthropogenic disturbances alter the conservation value of karst dolines
Source: Springer Nature journal article supplement (doi:10.1007/s10531-019-01896-4), 2019-11-09
Supplement: MOESM1 [file 17371368]

## **Anthropogenic disturbances alter the conservation value of karst dolines**

Zoltán Bátori\*, András Vojtkó, Gunnar Keppel, Csaba Tölgyesi, Andraž Čarni, Matija Zorn,  
Tünde Farkas, László Erdős, Péter János Kiss, Gábor Módra, Mateja Breg Valjavec

Department of Ecology, University of Szeged, Közép fasor 52, H-6726 Szeged, Hungary

\*corresponding author

e-mail: [zbatory@gmail.com](mailto:zbatory@gmail.com)

**Table E1** Diameter and depth values of the dolines (D1: dolines with little disturbance; D2: dolines with medium disturbance; D3: dolines with high disturbance) in Kras (Slovenia), Mecsek, forested site in Bükk and non-forested site in Bükk (Hungary)

|                                | <b>diameter (m)</b> | <b>depth (m)</b> |
|--------------------------------|---------------------|------------------|
| <b>Kras</b>                    |                     |                  |
| D1 – 1                         | 55                  | 12               |
| D1 – 2                         | 40                  | 6                |
| D1 – 3                         | 40                  | 10               |
| D2 – 1                         | 70                  | 10               |
| D2 – 2                         | 50                  | 8                |
| D2 – 3                         | 30                  | 5                |
| D3 – 1                         | 60                  | 8                |
| D3 – 2                         | 55                  | 9                |
| D3 – 3                         | 40                  | 9                |
| <b>Mecsek</b>                  |                     |                  |
| D1 – 1                         | 55                  | 13               |
| D1 – 2                         | 65                  | 15               |
| D1 – 3                         | 105                 | 16               |
| D2 – 1                         | 50                  | 10               |
| D2 – 2                         | 70                  | 10               |
| D2 – 3                         | 100                 | 15               |
| D3 – 1                         | 85                  | 14               |
| D3 – 2                         | 55                  | 10               |
| D3 – 3                         | 65                  | 13               |
| <b>Bükk, forested site</b>     |                     |                  |
| D1 – 1                         | 70                  | 12               |
| D1 – 2                         | 85                  | 12               |
| D1 – 3                         | 70                  | 10               |
| D2 – 1                         | 85                  | 10               |
| D2 – 2                         | 85                  | 12               |
| D2 – 3                         | 80                  | 10               |
| <b>Bükk, non-forested site</b> |                     |                  |
| D1 – 1                         | 85                  | 15               |
| D1 – 2                         | 85                  | 7                |
| D1 – 3                         | 65                  | 12               |
| D2 – 1                         | 70                  | 12               |
| D2 – 2                         | 75                  | 12               |
| D2 – 3                         | 55                  | 7                |
| D3 – 1                         | 70                  | 15               |
| D3 – 2                         | 60                  | 7                |
| D3 – 3                         | 70                  | 7                |

**Table E2** List of cool-adapted plant species in Kras (Slovenia), Mecsek, forested site in Bükk, and non-forested site in Bükk (Hungary)

---

**Kras:** *Aconitum lycoctonum*, *Actaea spicata*, *Anemone nemorosa*, *Asarum europaeum*, *Athyrium filix-femina*, *Campanula trachelium*, *Cardamine enneaphyllos*, *Carex digitata*, *Cephalanthera damasonium*, *Clematis vitalba*, *Corylus avellana*, *Cruciata glabra*, *Cyclamen purpurascens*, *Dryopteris filix-mas*, *Euphorbia dulcis*, *Fragaria moschata*, *Galanthus nivalis*, *Geranium robertianum*, *Geum urbanum*, *Hedera helix*, *Hepatica nobilis*, *Heracleum sphondylium*, *Lamium galeobdolon* subsp. *montanum*, *Lamium orvala*, *Lathyrus venetus*, *Lathyrus vernus*, *Lonicera xylosteum*, *Melica nutans*, *Mercurialis perennis*, *Moehringia muscosa*, *Lactuca muralis*, *Neottia nidus-avis*, *Neottia ovata*, *Oxalis acetosella*, *Platanthera bifolia*, *Polygonatum multiflorum*, *Polypodium vulgare*, *Primula vulgaris*, *Pseudofumaria alba*, *Pulmonaria officinalis*, *Rosa arvensis*, *Salvia glutinosa*, *Symphytum tuberosum*, *Thalictrum aquilegifolium*, *Viola mirabilis*, *Viola reichenbachiana*.

**Mecsek:** *Aremonia agrimonoides*, *Asarum europaeum*, *Athyrium filix-femina*, *Bromus ramosus*, *Cardamine bulbifera*, *Cardamine impatiens*, *Carex digitata*, *Carex pilosa*, *Carex remota*, *Carex sylvatica*, *Chrysosplenium alternifolium*, *Circaea lutetiana*, *Dryopteris affinis*, *Dryopteris carthusiana*, *Dryopteris filix-mas*, *Euphorbia amygdaloides*, *Festuca drymeja*, *Galium odoratum*, *Glechoma hirsuta*, *Hepatica nobilis*, *Hordelymus europaeus*, *Lamium galeobdolon* s.l., *Lathyrus vernus*, *Mercurialis perennis*, *Milium effusum*, *Oxalis acetosella*, *Paris quadrifolia*, *Polygonatum multiflorum*, *Pulmonaria officinalis*, *Rosa arvensis*, *Rumex sanguineus*, *Ruscus hypoglossum*, *Sanicula europaea*, *Stachys sylvatica*, *Symphytum tuberosum*, *Veronica montana*, *Viola reichenbachiana*.

**Bükk, forested site:** *Aconitum moldavicum*, *Aconitum variegatum*, *Actaea spicata*, *Anthriscus nitida*, *Asarum europaeum*, *Astrantia major*, *Athyrium filix-femina*, *Chrysosplenium alternifolium*, *Daphne mezereum*, *Dryopteris carthusiana*, *Dryopteris dilatata*, *Festuca altissima*, *Geranium phaeum*, *Hesperis matronalis*, *Hordelymus europaeus*, *Hypericum maculatum*, *Impatiens noli-tangere*, *Lunaria rediviva*, *Maianthemum bifolium*, *Moneses uniflora*, *Myosotis sylvatica*, *Oxalis acetosella*, *Polygonatum verticillatum*, *Primula elatior*, *Ribes alpinum*, *Rosa pendulina*, *Senecio ovatus*, *Silene dioica*, *Soldanella hungarica*.

**Bükk, non-forested site:** *Aconitum moldavicum*, *Aconitum variegatum*, *Alchemilla monticola*, *Astrantia major*, *Botrychium lunaria*, *Bupleurum longifolium*, *Carex pallescens*, *Carlina acaulis*, *Cirsium oleraceum*, *Dianthus deltoides*, *Euphorbia lucida*, *Festuca ovina*, *Filipendula ulmaria*, *Galium boreale*, *Gentiana pneumonanthe*, *Gentianella austriaca*, *Geranium palustre*, *Gladiolus imbricatus*, *Hypericum maculatum*, *Iris sibirica*, *Molinia caerulea*, *Myosotis sylvatica*, *Nardus stricta*, *Ophioglossum vulgatum*, *Oxalis acetosella*, *Parnassia palustris*, *Peucedanum palustre*, *Polygonatum verticillatum*, *Potentilla erecta*, *Primula elatior*, *Rosa pendulina*, *Succisa pratensis*, *Thymus pulegioides*, *Viola canina*.

---

**Table E3** List of moist-adapted plant species in Kras (Slovenia), Mecsek, forested site in Bükk, and non-forested site in Bükk (Hungary)

---

**Kras:** *Aconitum lycoctonum*, *Arabis turrata*, *Asarum europaeum*, *Carex flacca*, *Colchicum autumnale*, *Helleborus multifidus* subsp. *istriacus*, *Hieracium racemosum*, *Lamium orvala*, *Lathyrus pratensis*, *Lilium bulbiferum*, *Moehringia muscosa*, *Neottia ovata*, *Oxalis acetosella*, *Salvia glutinosa*, *Stenactis annua*, *Symphytum tuberosum*, *Thalictrum aquilegifolium*, *Urtica dioica*.

**Mecsek:** *Ajuga reptans*, *Aremonia agrimonoides*, *Asarum europaeum*, *Athyrium filix-femina*, *Carex digitata*, *Carex remota*, *Carex sylvatica*, *Chrysosplenium alternifolium*, *Circaea lutetiana*, *Crataegus laevigata*, *Dryopteris carthusiana*, *Festuca drymeja*, *Galium aparine*, *Geranium robertianum*, *Lamium galeobdolon* s.l., *Lathyrus vernus*, *Lysimachia nummularia*, *Mercurialis perennis*, *Milium effusum*, *Oxalis acetosella*, *Paris quadrifolia*, *Pulmonaria officinalis*, *Rumex sanguineus*, *Ruscus hypoglossum*, *Sambucus nigra*, *Sanicula europaea*, *Stachys sylvatica*, *Urtica dioica*, *Veronica montana*.

**Bükk, forested site:** *Aegopodium podagraria*, *Athyrium filix-femina*, *Cardamine impatiens*, *Carduus crispus*, *Chaerophyllum aromaticum*, *Chrysosplenium alternifolium*, *Dryopteris carthusiana*, *Festuca gigantea*, *Impatiens noli-tangere*, *Lapsana communis*, *Lunaria rediviva*, *Lysimachia nummularia*, *Oxalis acetosella*, *Ranunculus repens*, *Sambucus nigra*, *Solanum dulcamara*, *Stachys sylvatica*, *Urtica dioica*.

**Bükk, non-forested site:** *Aegopodium podagraria*, *Cardamine pratensis*, *Carex hirta*, *Cirsium oleraceum*, *Euphorbia lucida*, *Filipendula ulmaria*, *Frangula alnus*, *Galium boreale*, *Gentiana pneumonanthe*, *Geranium palustre*, *Gymnadenia conopsea*, *Iris sibirica*, *Lathyrus pratensis*, *Leucanthemum vulgare*, *Linum catharticum*, *Lysimachia nummularia*, *Molinia caerulea*, *Ophioglossum vulgatum*, *Oxalis acetosella*, *Parnassia palustris*, *Peucedanum palustre*, *Potentilla erecta*, *Ranunculus acris*, *Scorzoneroides autumnalis*, *Succisa pratensis*, *Thalictrum lucidum*, *Urtica dioica*, *Viburnum opulus*.

---

**Table E4** List of plant species of high conservation importance in Kras (Slovenia), Mecsek, forested site in Bükk, and non-forested site in Bükk (Hungary)

---

**Kras:** *Cephalanthera damasonium*, *Cephalanthera longifolia*, *Convallaria majalis*, *Cyclamen purpurascens*, *Dianthus hyssopifolius*, *Galanthus nivalis*, *Helleborus multifidus* subsp. *istriacus*, *Iris graminea*, *Lilium bulbiferum*, *Limodorum abortivum*, *Neottia nidus-avis*, *Neottia ovata*, *Platanthera bifolia*, *Paeonia officinalis*.

**Mecsek:** *Aremonia agrimonoides*, *Dioscorea communis*, *Dryopteris affinis*, *Dryopteris carthusiana*, *Helleborus odorus*, *Hepatica nobilis*, *Lathyrus venetus*, *Ruscus aculeatus*, *Ruscus hypoglossum*.

**Bükk, forested site:** *Aconitum moldavicum*, *Aconitum variegatum*, *Anthriscus nitida*, *Astrantia major*, *Daphne mezereum*, *Dryopteris carthusiana*, *Dryopteris dilatata*, *Epipactis helleborine*, *Festuca altissima*, *Helleborus purpurascens*, *Hesperis matronalis*, *Hypericum maculatum*, *Lunaria rediviva*, *Moneses uniflora*, *Myosotis sylvatica*, *Neottia nidus-avis*, *Polygonatum verticillatum*, *Primula elatior*, *Ribes alpinum*, *Rosa pendulina*, *Sambucus racemosa*, *Silene dioica*, *Thlaspi jankae*.

**Bükk, non-forested site:** *Aconitum moldavicum*, *Aconitum variegatum*, *Alchemilla monticola*, *Anemone sylvestris*, *Astrantia major*, *Botrychium lunaria*, *Bupleurum longifolium*, *Carlina acaulis*, *Centaurea scabiosa* subsp. *sadleriana*, *Dianthus deltoides*, *Festuca ovina*, *Gentiana pneumonanthe*, *Gentianella austriaca*, *Gentiana cruciata*, *Geranium palustre*, *Gladiolus imbricatus*, *Gymnadenia conopsea*, *Helleborus purpurascens*, *Hieracium laevigatum*, *Hypericum maculatum*, *Iris graminea*, *Iris sibirica*, *Iris variegata*, *Lilium martagon*, *Myosotis sylvatica*, *Nardus stricta*, *Ophioglossum vulgatum*, *Parnassia palustris*, *Peucedanum palustre*, *Polygonatum verticillatum*, *Primula elatior*, *Prunella grandiflora*, *Pulsatilla grandis*, *Rosa pendulina*, *Silene italica* subsp. *nemoralis*, *Thlaspi jankae*.

---

**Table E5** Comparisons of plant species composition between habitats (D1: little disturbed dolines and D1R: little disturbed plateau), and among disturbance classes in the dolines (D1: little, D2: medium and D3: high disturbance) with one-way analysis of similarities (ANOSIM) in Slovenia (Kras) and Hungary (Mecsek, Bükk). The *p* values in pairwise comparisons were Bonferroni corrected. Significant differences ( $p < 0.05$ ) are indicated by bold *p* values

| <b>Kras</b>                |      |                | <b>Mecsek</b>                  |      |                |
|----------------------------|------|----------------|--------------------------------|------|----------------|
|                            | R    | p              |                                | R    | p              |
| D1 – D1R                   | 0.45 | < <b>0.001</b> | D1 – D1R                       | 0.36 | < <b>0.001</b> |
|                            | 0.07 | < <b>0.001</b> |                                | 0.25 | < <b>0.001</b> |
| D1 – D2                    | 0.10 | < <b>0.001</b> | D1 – D2                        | 0.18 | < <b>0.001</b> |
| D1 – D3                    | 0.08 | < <b>0.001</b> | D1 – D3                        | 0.26 | < <b>0.001</b> |
| D2 – D3                    | 0.02 | 0.220          | D2 – D3                        | 0.31 | < <b>0.001</b> |
| <b>Bükk, forested site</b> |      |                | <b>Bükk, non-forested site</b> |      |                |
|                            | R    | p              |                                | R    | p              |
| D1 – D1R                   | 0.23 | < <b>0.001</b> | D1 – D1R                       | 0.28 | < <b>0.001</b> |
| D1 – D2                    | 0.52 | < <b>0.001</b> |                                | 0.39 | < <b>0.001</b> |
|                            |      |                | D1 – D2                        | 0.40 | < <b>0.001</b> |
|                            |      |                | D1 – D3                        | 0.49 | < <b>0.001</b> |
|                            |      |                | D2 – D3                        | 0.28 | < <b>0.001</b> |

**Table E6** Comparisons of the number of cool-adapted plant species between habitats (D1: little disturbed dolines and D1R: little disturbed plateau), and among disturbance classes in the dolines (D1: little, D2: medium and D3: high disturbance) using the fitted mixed-effect models. The  $p$  values were corrected with the FDR (false discovery rate) method. Significant differences ( $p < 0.05$ ) are indicated by bold  $p$  values

| <b>Kras</b>                |       |                | <b>Mecsek</b>                  |       |                |
|----------------------------|-------|----------------|--------------------------------|-------|----------------|
|                            | $z$   | $p$            |                                | $z$   | $p$            |
| D1 – D1R                   | -6.60 | < <b>0.001</b> | D1 – D1R                       | -2.39 | <b>0.017</b>   |
|                            | $X^2$ | $p$            |                                | $X^2$ | $p$            |
|                            | 0.65  | 0.722          |                                | 47.92 | < <b>0.001</b> |
|                            | $z$   | $p$            |                                | $z$   | $p$            |
| D1 – D2                    | -0.45 | 0.729          | D1 – D2                        | -3.38 | < <b>0.001</b> |
| D1 – D3                    | -0.80 | 0.729          | D1 – D3                        | -6.90 | < <b>0.001</b> |
| D2 – D3                    | -0.35 | 0.729          | D2 – D3                        | -3.68 | < <b>0.001</b> |
| <b>Bükk, forested site</b> |       |                | <b>Bükk, non-forested site</b> |       |                |
|                            | $z$   | $p$            |                                | $z$   | $p$            |
| D1 – D1R                   | 0.05  | 0.960          | D1 – D1R                       | -5.39 | < <b>0.001</b> |
| D1 – D2                    | 2.35  | <b>0.019</b>   |                                | $X^2$ | $p$            |
|                            |       |                |                                | 9.27  | <b>0.010</b>   |
|                            |       |                |                                | $z$   | $p$            |
|                            |       |                | D1 – D2                        | -0.55 | 0.582          |
|                            |       |                | D1 – D3                        | -2.89 | <b>0.009</b>   |
|                            |       |                | D2 – D3                        | -2.35 | <b>0.029</b>   |

**Table E7** Comparisons of the number of moist-adapted plant species between habitats (D1: little disturbed dolines and D1R: little disturbed plateau), and among disturbance classes in the dolines (D1: little, D2: medium and D3: high disturbance) using the fitted mixed-effect models. The  $p$  values were corrected with the FDR (false discovery rate) method. Significant differences ( $p < 0.05$ ) are indicated by bold  $p$  values

| <b>Kras</b>                |       |                | <b>Mecsek</b>                  |       |                |
|----------------------------|-------|----------------|--------------------------------|-------|----------------|
|                            | $z$   | $p$            |                                | $z$   | $p$            |
| D1 – D1R                   | -7.07 | < <b>0.001</b> | D1 – D1R                       | -2.88 | <b>0.004</b>   |
|                            | $X^2$ | $p$            |                                | $X^2$ | $p$            |
|                            | 3.30  | 0.192          |                                | 43.26 | < <b>0.001</b> |
|                            | $z$   | $p$            |                                | $z$   | $p$            |
| D1 – D2                    | -0.83 | 0.407          | D1 – D2                        | -4.13 | < <b>0.001</b> |
| D1 – D3                    | -1.82 | 0.069          | D1 – D3                        | -6.29 | < <b>0.001</b> |
| D2 – D3                    | -0.96 | 0.339          | D2 – D3                        | -2.35 | <b>0.019</b>   |
| <b>Bükk, forested site</b> |       |                | <b>Bükk, non-forested site</b> |       |                |
|                            | $z$   | $p$            |                                | $z$   | $p$            |
| D1 – D1R                   | -3.01 | <b>0.003</b>   | D1 – D1R                       | -4.93 | < <b>0.001</b> |
| D1 – D2                    | 4.46  | < <b>0.001</b> |                                | $X^2$ | $p$            |
|                            |       |                |                                | 15.12 | < <b>0.001</b> |
|                            |       |                |                                | $z$   | $p$            |
|                            |       |                | D1 – D2                        | -1.37 | 0.170          |
|                            |       |                | D1 – D3                        | -3.86 | < <b>0.001</b> |
|                            |       |                | D2 – D3                        | -2.51 | <b>0.012</b>   |



**Table E8** Comparisons of the number of plant species of high conservation importance between habitats (D1: little disturbed dolines and D1R: little disturbed plateau), and among disturbance classes in the dolines (D1: little, D2: medium and D3: high disturbance) using the fitted mixed-effect models. The  $p$  values were corrected with the FDR (false discovery rate) method. Significant differences ( $p \leq 0.05$ ) are indicated by bold  $p$  values

| <b>Kras</b>                |       |       | <b>Mecsek</b>                  |       |                   |
|----------------------------|-------|-------|--------------------------------|-------|-------------------|
|                            | $z$   | $p$   |                                | $z$   | $p$               |
| D1 – D1R                   | -0.05 | 0.964 | D1 – D1R                       | -1.59 | 0.112             |
|                            | $X^2$ | $p$   |                                | $X^2$ | $p$               |
|                            | 3.50  | 0.174 |                                | 2.70  | 0.260             |
|                            | $z$   | $p$   |                                | $z$   | $p$               |
| D1 – D2                    | -1.86 | 0.186 | D1 – D2                        | -1.54 | 0.360             |
| D1 – D3                    | -0.71 | 0.480 | D1 – D3                        | -1.18 | 0.360             |
| D2 – D3                    | 1.25  | 0.318 | D2 – D3                        | 0.37  | 0.712             |
| <b>Bükk, forested site</b> |       |       | <b>Bükk, non-forested site</b> |       |                   |
|                            | $z$   | $p$   |                                | $z$   | $p$               |
| D1 – D1R                   | -1.69 | 0.091 | D1 – D1R                       | -2.99 | <b>0.003</b>      |
| D1 – D2                    | 1.13  | 0.259 |                                | $X^2$ | $p$               |
|                            |       |       |                                | 16.23 | <b>&lt; 0.001</b> |
|                            |       |       |                                | $z$   | $p$               |
|                            |       |       | D1 – D2                        | -1.95 | <b>0.050</b>      |
|                            |       |       | D1 – D3                        | -4.03 | <b>&lt; 0.001</b> |
|                            |       |       | D2 – D3                        | -2.17 | <b>0.049</b>      |
